# Supplementary material
Source: MDPI journal article supplement (https://www.mdpi.com/2313-4321/4/3/34)
Supplement: s1 [file s1]

Archive with 4 entries (4 files):
- Loevik2019_metal_mass_fractions_in_automobile_SLF_Readme.txt
- mean_sd_ppm.csv
- single_digestions_ppm.csv
- supporting_information.pdf
