# Supplementary material
Source: MDPI journal article supplement (https://www.mdpi.com/2313-4321/4/3/34)
Supplement: s1 [file s1 › Loevik2019_metal_mass_fractions_in_automobile_SLF_Readme.txt]

This Loevik2019_metal_mass_fractions_in_automobile_SLF_Readme.txt file was generated on 20190621 by Amund N. Løvik


-------------------

GENERAL INFORMATION

-------------------


1. Title of Dataset: Loevik2019_metal_mass_fractions_in_automobile_SLF


2. Author Information


  Principal Investigator Contact Information

           Name:Amund N. Løvik

           Institution: Empa, Swiss Federal Laboratories for Materials Science and Technology

           Address: Lerchenfeldstrasse 5, 9014 St. Gallen, Switzerland

           Email: amund.loevik@empa.ch


  Associate or Co-investigator Contact Information

           Name: Renato Figi

           Institution: Empa, Swiss Federal Laboratories for Materials Science and Technology

           Address: Ueberlandstrasse 129, 8600 Dübendorf, Switzerland

           Email: renato.figi@empa.ch


  Alternate Contact Information

           Name:

           Institution: Empa, Swiss Federal Laboratories for Materials Science and Technology

           Address: Lerchenfeldstrasse 5, 9014 St. Gallen, Switzerland

           Email: patrick.waeger@empa.ch


3. Date of data collection (single date, range, approximate date): 20170515-20171023


4. Geographic location of data collection (where was data collected?): Dübendorf, Switzerland and Berlin, Germany 


5. Information about funding sources that supported the collection of the data: EU H2020 grant 641999 (ProSUM project)


--------------------------

SHARING/ACCESS INFORMATION

-------------------------- 


1. Licenses/restrictions placed on the data: CC0 1.0 Universal (CC0 1.0) Public Domain Dedication, https://creativecommons.org/publicdomain/zero/1.0/


2. Links to publications that cite or use the data: 


3. Links to other publicly accessible locations of the data:


4. Links/relationships to ancillary data sets:


5. Was data derived from another source?

           If yes, list source(s):


6. Recommended citation for the data: Løvik, Amund N., Renato Figi, Claudia Schreiner, Matthias Rösslein, Rolf Widmer, Rainer Bunge, Thomas Pohl, Claudia Kuntz, Paul Martin Mählitz, Vera Susanne Rotter, Patrick Wäger “Variability and Bias in Measurements of Metals Mass Fractionss in Automobile Shredder Residue.” Recycling, 2019.


---------------------

DATA & FILE OVERVIEW

---------------------


1. File List

   A. Filename: single_digestions_ppm.csv        

      Short description: Measured mass fractions of metals in individually digested test samples of automobile shredder light fraction        


        

   B. Filename: mean_sd_ppm.csv        

      Short description: Mean and standard deviation of measured metal mass fractions in automobile shredder light fraction samples        


2. Relationship between files: mean_sd_ppm.csv contains the means and standard deviations calculated from the measurements of the individually digested test samples in single_digestions_ppm.csv      


3. Additional related data collected that was not included in the current data package: related data, e.g. on the sample preparation process can be found in the original publication (see SHARING/ACCESS INFORMATION section 6)


4. Are there multiple versions of the dataset? yes/no

   If yes, list versions:

           Name of file that was updated:

                     i. Why was the file updated? 

                ii. When was the file updated?

           Name of file that was updated:

                      i. Why was the file updated?

                    ii. When was the file updated?


--------------------------

METHODOLOGICAL INFORMATION

--------------------------


1. Description of methods used for collection/generation of data: wavelength-dispersive X-ray fluorescence spectrometry (WD-XRF), indictively coupled plasma mass spectrometry (ICP-MS), inductively coupled plasma optical emission spectrometry (ICP-OES); further described in ref. in SHARING/ACCESS INFORMATION section 6.


2. Methods for processing the data: described in ref. in SHARING/ACCESS INFORMATION section 6.


3. Instrument- or software-specific information needed to interpret the data:


4. Standards and calibration information, if appropriate: element spikes before digestions, certified standard reference material


5. Environmental/experimental conditions: described in ref. in SHARING/ACCESS INFORMATION section 6.


6. Describe any quality-assurance procedures performed on the data:


7. People involved with sample collection, processing, analysis and/or submission: Amund N.Løvik, Renato Figi, Claudia Schreiner, Matthias Rösslein, Rolf Widmer, Rainer Bunge, Thomas Pohl, Claudia Kuntz, Paul Martin Mählitz, Vera Susanne Rotter, Patrick Wäger, Lorena Toledo, Didier Beloin-Saint-Pierre, Veronique Adam, Melanie Bürki


-----------------------------------------

DATA-SPECIFIC INFORMATION FOR: single_digestions_ppm.csv

-----------------------------------------


1. Number of variables: 33


2. Number of cases/rows: 290


3. Variable List

    A. Name: approach

       Description: general approach used for chemical analysis, further described in ref. in SHARING/ACCESS INFORMATION section 6.

                    Value labels: IH, Val, XRF


    B. Name: prep

       Description: sample preparation method (=digestion acid for IH and Val approaches)

                    Value labels: HNO3, AR, fusion, powder, wax


    C. Name: det

       Description: element detection method

                    Value labels: OES, MS, XRF


    D. Name: sample

       Description: sample name (refers to two large (~160 kg) primary samples of unprocessed automobile shredder light fraction)

                    Value labels: S1, S2


    E. Name: material

       Description: subsample name (the primary samples went through an extensive physical sample preparation process and were separated into a "plastics" and "metals" fraction. metals_epoxy contains the "metals" fraction and an organic epoxy before the latter was removed in a thermal process.)

                    Value labels: plastics, metals, metals_epoxy


    F. Name: replicate

       Description: test sample identifier (each subsample was analysed using 3-5 individually digested test samples of 0.1-0.2 g each for wet chemical analysis)

                    Value labels: 1, 2, 3, 4, 5


    G. Name: Ag, Al, Au, Be, Cd, Ce, Co, Cr, Cu, Dy, Fe, Ga, Ge, In, La, Mg, Ni, Nd, Pb, Pd, Pt, Sb, Sm, Sn, Y, Yb, Zn

       Description: mass fractions/(mg/kg) of elements (specified by variable names)

                    Value labels:


4. Missing data codes:

        "nd"        not detected

        emtpy cells    no measurement attempted


5. Specialized formats of other abbreviations used: IH (in-house), Val (validated), MS (inductively coupled plasma mass spectrometry), OES (inductively couple plasma optical emission spectrometry), XRF (x-ray fluorescence spectrometry), AR (aqua regia), HNO3 (mixture of H202 and HNO3)


-----------------------------------------

DATA-SPECIFIC INFORMATION FOR: mean_sd_ppm.csv

-----------------------------------------


1. Number of variables: 59


2. Number of cases/rows: 62


3. Variable List

    A. Name: approach

       Description: general approach used for chemical analysis, further described in ref. in SHARING/ACCESS INFORMATION section 6.

                    Value labels: IH, Val, XRF


    B. Name: prep

       Description: sample preparation method (=digestion acid for IH and Val approaches)

                    Value labels: HNO3, AR, fusion, powder, wax


    C. Name: det

       Description: element detection method

                    Value labels: OES, MS, XRF


    D. Name: sample

       Description: sample name (refers to two large (~160 kg) primary samples of unprocessed automobile shredder light fraction)

                    Value labels: S1, S2


    E. Name: material

       Description: subsample name (the primary samples went through an extensive physical sample preparation process and were separated into a "plastics" and "metals" fraction. metals_epoxy contains the "metals" fraction and an organic epoxy before the latter was removed in a thermal process.)

                    Value labels: plastics, metals, metals_epoxy


    G. Name: Ag_mean, Al_mean, Au_mean, Be_mean, Cd_mean, Ce_mean, Co_mean, Cr_mean, Cu_mean, Dy_mean, Fe_mean, Ga_mean, Ge_mean, In_mean, La_mean, Mg_mean, Ni_mean, Nd_mean, Pb_mean, Pd_mean, Pt_mean, Sb_mean, Sm_mean, Sn_mean, Y_mean, Yb_mean, Zn_mean

       Description: mean mass fractions/(mg/kg) of elements (specified by variable names) measured in 3-5 individually digested test samples

                    Value labels:


    G. Name: Ag_sd, Al_sd, Au_sd, Be_sd, Cd_sd, Ce_sd, Co_sd, Cr_sd, Cu_sd, Dy_sd, Fe_sd, Ga_sd, Ge_sd, In_sd, La_sd, Mg_sd, Ni_sd, Nd_sd, Pb_sd, Pd_sd, Pt_sd, Sb_sd, Sm_sd, Sn_sd, Y_sd, Yb_sd, Zn_sd

       Description: sample standard deviation of mass fractions/(mg/kg) of elements (specified by variable names) measured in 3-5 individually digested test samples

                    Value labels:


4. Missing data codes:

        0        element was not detected in any of the test samples

        emtpy cells    no measurements attempted


5. Specialized formats of other abbreviations used: IH (in-house), Val (validated), MS (inductively coupled plasma mass spectrometry), OES (inductively couple plasma optical emission spectrometry), XRF (x-ray fluorescence spectrometry), AR (aqua regia), HNO3 (mixture of H202 and HNO3)
