# Supplementary material
Source: MDPI journal article supplement (https://www.mdpi.com/2313-4321/4/3/34)
Supplement: s1 [file s1 › mean_sd_ppm.csv]

approach	prep	det	sample	material	Ag_mean	Ag_sd	Al_mean	Al_sd	Au_mean	Au_sd	Be_mean	Be_sd	Cd_mean	Cd_sd	Ce_mean	Ce_sd	Co_mean	Co_sd	Cr_mean	Cr_sd	Cu_mean	Cu_sd	Dy_mean	Dy_sd	Fe_mean	Fe_sd	Ga_mean	Ga_sd	Ge_mean	Ge_sd	In_mean	In_sd	La_mean	La_sd	Mg_mean	Mg_sd	Nd_mean	Nd_sd	Ni_mean	Ni_sd	Pb_mean	Pb_sd	Pd_mean	Pd_sd	Pt_mean	Pt_sd	Sb_mean	Sb_sd	Sm_mean
IH	AR	MS	S1	metals					0.248777277	0.064993752					9.133333333	1.137248141															0.966666667	0.057735027	5.5	0.435889894
IH	AR	MS	S1	plastics					0.195009542	0.08631815					26.4	1.705872211															0.833333333	0.057735027	10.56666667	2.052640576
IH	AR	MS	S2	metals					1.071348859	0.489169821					8	0.7															2.1	0.556776436	22.36666667	2.267891826
IH	AR	MS	S2	plastics					0.271587016	0.1599987					26.7	4.138840417															0.5	0.264575131	10.86666667	1.201388086
IH	AR	OES	S1	metals_epoxy									7.633333333	0.230940108
IH	AR	OES	S1	metals	31.9	34.94467055	68615.56803	11523.87374	0	0	0.3	0			8.2	0.360555128	134.3	13.57681848	1234.4	512.7696656	147158.3667	13775.68665	0.033333333	0.057735027	269531.6333	51588.80179	23.26666667	3.286842456	2.733333333	0.802080628	6.333333333	0.404145188	4.166666667	0.305505046	3705.133333	200.755083	10.8	1.252996409	1022.4	183.7264543	1179.633333	173.3963475	0	0	1.366666667	0.513160144	88.4	41.27626437	0
IH	AR	OES	S1	plastics	11.1	8.072793816	19805.8504	3708.550954	0	0	0.1	0	4.933333333	0.2081666	10.6	0.1	32.93333333	1.4571662	364.4333333	37.00288277	3951.066667	2050.174906	0	0	84168.03333	7161.573253	12	1.609347694	1.666666667	0.461880215	3.366666667	1.415391583	8.6	1.95192213	2477.5	99.12209643	9.966666667	0.152752523	331.6	196.3665195	573.1	138.9874455	0	0	0.766666667	0.8326664	153.8666667	24.4217799	0
IH	AR	OES	S2	metals_epoxy									8.866666667	0.288675135
IH	AR	OES	S2	metals	48.26666667	30.57144637	49564.61242	3902.63398	0	0	0.333333333	0.057735027			53.4	4.176122604	193.5666667	22.09170282	3108.133333	700.2226098	215388.0333	17463.93758	1.4	0.1	282015	18492.78566	40.43333333	1.965536398	2.266666667	0.450924975	9.7	1.824828759	14.93333333	1.159022577	3856.066667	34.28736405	69.66666667	4.966219219	1771.066667	157.714975	626.3333333	6.101092798	12.3	4.028647416	16.06666667	1.040833	62.56666667	7.899578048	22.06666667
IH	AR	OES	S2	plastics	12.9	3.351119216	24988.10889	2207.620323	0	0	0.133333333	0.057735027	8.7	1.997498436	12.63333333	1.27410099	48.2	14.86842292	495.1	23.3826859	18857.46667	12566.23781	0.033333333	0.057735027	131587.0667	26060.6192	17.8	3.973663297	1.833333333	0.550757055	2.1	1.852025918	9.466666667	1.62583312	3038.1	486.6757442	9.266666667	1.890326251	374.9666667	61.71647538	1921.033333	153.91999	0	0	0.8	0.754983444	109.4333333	11.40453126	0.1
IH	HNO3	MS	S1	metals					1.109875725	0.171919668					6.1	0.608276253															0.4	0.346410162
IH	HNO3	MS	S1	plastics					1.016445286	0.352011142					16.33333333	2.375570107															0.633333333	0.152752523
IH	HNO3	MS	S2	metals					2.643263817	0.323041133					3.8	0.264575131															1.3	0.2
IH	HNO3	MS	S2	plastics					1.298236787	0.289719716					25.86666667	5.901129835															0.466666667	0.2081666
IH	HNO3	OES	S1	metals_epoxy									7.133333333	0.723417814
IH	HNO3	OES	S1	metals	31.66666667	34.53611636	52386.81394	5100.719081	0	0	0.133333333	0.115470054			5.933333333	0.288675135	162.0333333	26.3898339	3377.066667	373.1616316	184536.6	13690.10862	0	0	299916.9	86076.01548	8.933333333	0.723417814	0	0	15.9	1.053565375	0	0	3546.633333	403.8934307	9.4	0.3	1435.933333	147.9461501	604.1333333	85.70801207	0	0	1.4	0.360555128	35.43333333	3.75277675	1.5
IH	HNO3	OES	S1	plastics	13.33333333	3.156474827	18856.50736	2905.653648	0	0	0.033333333	0.057735027	6.366666667	1.250333289	8.966666667	1.553490693	38.83333333	8.776293827	437.7666667	47.23614435	2472.5	310.1853156	0	0	95293.6	13497.20432	4.866666667	1.357694124	0	0	10.73333333	1.913983629	0	0	2050.533333	77.7003432	11.1	1.664331698	209.1666667	8.40555372	878.7333333	87.87049182	0.3	0.519615242	0.2	0.2	28.2	6.710439628	1.166666667
IH	HNO3	OES	S2	metals_epoxy									9.166666667	1.096965511
IH	HNO3	OES	S2	metals	42.63333333	26.16951152	65423.31617	5611.244324	0	0	0.1	0.173205081			33.66666667	0.56862407	145.3333333	27.48642089	1072.433333	86.86312988	180117.3	14824.92301	0.333333333	0.057735027	266934.1667	51392.12146	7.466666667	3.12623309	0	0	22.4	2.690724809	0	0	3105.7	339.1111322	46.1	0.435889894	868.9666667	34.86220494	1315.066667	148.3181153	7	0.2	9.166666667	1.386842938	15.16666667	2.030599255	15.03333333
IH	HNO3	OES	S2	plastics	17.96666667	3.027099822	25635.20797	3210.247563	0	0	0.033333333	0.057735027	8.9	1.652271164	7.966666667	1.650252506	36.66666667	7.419119445	362.7	32.59263721	15373.8	2621.570943	0.4	0.692820323	110907.6333	21057.81535	5.233333333	2.236813209	0	0	12.26666667	2.350177298	10.46666667	18.12879845	2285.833333	112.4558728	7.833333333	1.588500341	360.7666667	71.53910353	2548.566667	843.4861133	0	0	0.233333333	0.404145188	13.7	7.767238892	0.2
Val	AR	MS	S1	metals_epoxy					0.444996344	0.307077465																											19.82	0.901110426					1.2	0.663324958	0	0	102.52	6.841198725
Val	AR	MS	S1	metals					0.880800793	0.227366642																											34.72	3.713758204					0.82	0.178885438	0	0	147.8	21.94766502
Val	AR	MS	S1	plastics					0.176194763	0.036739874																											29.06	8.317932435					2.4	0.273861279	0.1	0	144.28	7.974459229
Val	AR	MS	S2	metals_epoxy					0.780039496	0.256151832																											137.44	7.567892705					0.2	0	0	0	87.08	3.217452408
Val	AR	MS	S2	metals					1.914293583	0.907426099																											200.38	3.423010371					0.3	0	0	0	138.12	6.345234432
Val	AR	MS	S2	plastics					1.471903049	2.556373611																											21.58	6.198548217					3.16	0.56833089	0.56	0.134164079	115.94	15.58470404
Val	AR	OES	S1	metals_epoxy			45308	3542.389024																	138900	14791.04459															965.32	43.55309403
Val	AR	OES	S1	metals			84540	7011.162528																	262620	63447.59255															1717.8	189.4563274
Val	AR	OES	S1	plastics			20082	809.7962707																	86538	6057.373193															869.12	31.90927765
Val	AR	OES	S2	metals_epoxy			34502	1637.35152																	172860	9199.891304															444.44	46.26924464
Val	AR	OES	S2	metals			55722	3178.823682																	271580	5039.54363															682.36	52.45219728
Val	AR	OES	S2	plastics			19748	628.7447813																	77278	8410.176574															2439.2	190.6926847
Val	HNO3	MS	S1	metals_epoxy									0.7	0.122474487			49.64	5.104213945					2.36	0.753657747									3.66	0.384707681
Val	HNO3	MS	S1	metals									0.6	0			80.94	3.131772661					3.78	0.258843582									6.2	0.689202438
Val	HNO3	MS	S1	plastics									1.58	0.363318042			29.4	12.88254633					1.48	0.192353841									6.9	1.365650028
Val	HNO3	MS	S2	metals_epoxy									0.3	0.070710678			89.34	13.93944045					8.38	0.130384048									11.98	2.820815485
Val	HNO3	MS	S2	metals									0.32	0.04472136			134.58	21.97582763					12.8	0.353553391									19.14	3.145313975
Val	HNO3	MS	S2	plastics									3.46	0.559464029			25.04	4.877806884					0.88	0.04472136									12.44	10.112517
Val	HNO3	OES	S1	metals_epoxy															653.82	37.87845034	87732	12443.76028																	591.36	27.66591766
Val	HNO3	OES	S1	metals															1217	111.1575459	146840	13329.02847																	1001.78	43.21622381
Val	HNO3	OES	S1	plastics															456.3	82.34628103	5997.4	3919.211757																	312.54	67.50991038
Val	HNO3	OES	S2	metals_epoxy															2392.2	41.99642842	117082	4260.706514																	1096.2	36.07214992
Val	HNO3	OES	S2	metals															3847.6	111.7644845	190802	6576.702821																	1820.4	40.6238846
Val	HNO3	OES	S2	plastics															446.6	29.22575919	8404.8	2556.429483																	446.76	80.48908622
XRF	fusion	XRF	S1	metals_epoxy			75000												2000		90000				170000														1000		0						0
XRF	fusion	XRF	S1	metals			83000												2000		110000				200000														1000		0						0
XRF	fusion	XRF	S1	plastics			30000												1000		7000				100000														400		300						0
XRF	fusion	XRF	S2	metals_epoxy			50000												4000		120000				220000														2000
XRF	fusion	XRF	S2	metals			55000												4000		130000				240000														2000		0						0
XRF	fusion	XRF	S2	plastics			35000												1000		8000				100000														700		1000						0
XRF	powder	XRF	S1	metals_epoxy			60000												1000		100000				140000														1000		2000						0
XRF	powder	XRF	S1	metals			121000												2000		140000				220000														1000		3000						200
XRF	powder	XRF	S1	plastics			30000												1000		4000				130000														500		2000						300
XRF	powder	XRF	S2	metals_epoxy			51000												3000		130000				180000														1100		600						200
XRF	powder	XRF	S2	metals			79000												5000		200000				270000														2000		700						0
XRF	powder	XRF	S2	plastics			25000												1000		4000				100000														500		4000						200
XRF	wax	XRF	S1	metals_epoxy			53000												1000		100000				150000														1000		2000						0
XRF	wax	XRF	S1	metals			80000												2000		180000				260000														1200		2000						0
XRF	wax	XRF	S1	plastics			23000												1000		6000				140000														600		3000						400
XRF	wax	XRF	S2	metals_epoxy			44000												3000		140000				190000														1100		600						0
XRF	wax	XRF	S2	metals			59000												5000		220000				290000														2000		1000						0
XRF	wax	XRF	S2	plastics			18000												1000		5000				111000														800		5000						300
[truncated: 9 more columns]
