# Supplementary material
Source: MDPI journal article supplement (https://www.mdpi.com/2313-4321/4/3/34)
Supplement: s1 [file s1 › single_digestions_ppm.csv]

approach	prep	det	sample	material	replicate	Ag	Al	Au	Be	Cd	Ce	Co	Cr	Cu	Dy	Fe	Ga	Ge	In	La	Mg	Ni	Nd	Pb	Pd	Pt	Sb	Sm	Sn	Y	Yb	Zn
IH	HNO3	OES	S2	plastics	1	15.2	24357.51748	nd	0.1	9.7	9.6	44.6	380.1	16223.8	nd	132036.7	7.8	nd	14.6	nd	2348.8	344	8.8	3507.9	nd	nd	4.9	0.6	86	93.4	93.5	30354
IH	HNO3	OES	S2	plastics	2	21.2	29287.57602	nd	nd	7	6.3	29.9	325.1	12432.7	1.2	89921.8	4.2	nd	9.9	31.4	2352.7	299.1	6	2214.6	nd	nd	16.6	nd	75.1	107.5	104.1	21802.8
IH	HNO3	OES	S2	plastics	3	17.5	23260.53042	nd	nd	10	8	35.5	382.9	17464.9	nd	110764.4	3.7	nd	12.3	nd	2156	439.2	8.7	1923.2	nd	0.7	19.6	nd	87.9	98.2	101	20822.9
IH	HNO3	OES	S1	plastics	1	16.6	16989.55366	nd	0.1	5.5	7.7	48.2	483.9	2828.1	nd	101756.9	5.6	nd	11.3	nd	2050.8	211.3	10.4	891.7	0.9	0.2	29.6	3.5	nd	146.3	145.2	18523.3
IH	HNO3	OES	S1	plastics	2	13.1	17375.71702	nd	nd	7.8	8.5	30.8	389.5	2257.6	nd	79780.1	3.3	nd	8.6	nd	2128.1	216.3	9.9	959.4	nd	0	34.1	nd	109.9	163.3	154	19321.2
IH	HNO3	OES	S1	plastics	3	10.3	22204.25139	nd	nd	5.8	10.7	37.5	439.9	2331.8	nd	104343.8	5.7	nd	12.3	nd	1972.7	199.9	13	785.1	nd	0.4	20.9	nd	87.6	139.3	134	18710.7
IH	HNO3	OES	S2	metals	1	15.9	65004.33651	nd	0.3		33.2	118.7	997	197137.9	0.4	220078.1	10.8	nd	25.4	nd	3413.7	831.3	45.9	1483.5	7	8.8	13.8	15.3	nd	4.8	6.5	12680
IH	HNO3	OES	S2	metals	2	68.2	60033.30558	nd	nd		34.3	143.7	1167.4	170025	0.3	321898.4	4.6	nd	20.2	nd	2742.3	900.1	46.6	1257.7	7.2	8	17.5	14.9	175.7	4.5	5.5	20137.4
IH	HNO3	OES	S2	metals	3	43.8	71232.30641	nd	0		33.5	173.6	1052.9	173189	0.3	258826	7	nd	21.6	nd	3161.1	875.5	45.8	1204	6.8	10.7	14.2	14.9	138.6	4.7	6	12306.4
IH	HNO3	OES	S1	metals	1	13.4	49081.80301	nd	0.2		5.6	132.4	2994.2	178255.4	nd	224248.7	9.3	nd	16.9	nd	3310.9	1285.9	9.1	530.9	nd	1.3	31.1	0.1	5.5	3.8	4.3	7984.1
IH	HNO3	OES	S1	metals	2	10.1	58261.28722	nd	0.2		6.1	170.7	3739.7	200240.2	nd	281940.4	9.4	nd	14.8	nd	4013	1581.7	9.4	698.4	nd	1.8	37.6	1.6	nd	4	4.5	9217.1
IH	HNO3	OES	S1	metals	3	71.5	49817.3516	nd	0		6.1	183	3397.3	175114.2	nd	393561.6	8.1	nd	16	nd	3316	1440.2	9.7	583.1	nd	1.1	37.6	2.8	274.9	4.2	4.7	8027.4
IH	HNO3	OES	S2	metals_epoxy	1					10.4
IH	HNO3	OES	S2	metals_epoxy	2					8.3
IH	HNO3	OES	S2	metals_epoxy	3					8.8
IH	HNO3	OES	S1	metals_epoxy	1					7.6
IH	HNO3	OES	S1	metals_epoxy	2					6.3
IH	HNO3	OES	S1	metals_epoxy	3					7.5
IH	HNO3	MS	S2	plastics	1			1.631993007			32.5								0.7											76.8
IH	HNO3	MS	S2	plastics	2			1.151172893			23.9								0.3											79.8
IH	HNO3	MS	S2	plastics	3			1.111544462			21.2								0.4											88.5
IH	HNO3	MS	S1	plastics	1			0.729344729			13.6								0.6											76.4
IH	HNO3	MS	S1	plastics	2			1.40917782			17.9								0.5											84.1
IH	HNO3	MS	S1	plastics	3			0.910813309			17.5								0.8											65.8
IH	HNO3	MS	S2	metals	1			2.691240243			4								1.5											5.5
IH	HNO3	MS	S2	metals	2			2.939633639			3.5								1.1											5.1
IH	HNO3	MS	S2	metals	3			2.298917569			3.9								1.3											5.4
IH	HNO3	MS	S1	metals	1			0.94115192			5.7								0.2											4.1
IH	HNO3	MS	S1	metals	2			1.284822286			6.8								0.2											4.3
IH	HNO3	MS	S1	metals	3			1.103652968			5.8								0.8											4.5
IH	AR	OES	S2	plastics	1	16.3	24223.08188	nd	0.2	7	12	36.4	468.1	7727.3	nd	104996.8	14.1	2.4	2.8	7.7	3433.3	431.3	8.6	1753.1	nd	0.9	119.2	nd	189.5	96.3	93	24887.2
IH	AR	OES	S2	plastics	2	12.8	27476.48035	nd	0.1	10.9	14.1	64.9	508.6	32484.8	0.1	157083.6	22	1.8	nd	10.9	2494.5	384.6	11.4	1954.6	nd	nd	112.2	0.3	255.8	70.2	68.9	33176.5
IH	AR	OES	S2	plastics	3	9.6	23264.76443	nd	0.1	8.2	11.8	43.3	508.6	16360.3	nd	132680.8	17.3	1.3	3.5	9.8	3186.5	309	7.8	2055.4	nd	1.5	96.9	nd	220.4	80.4	75.5	26632.4
IH	AR	OES	S1	plastics	1	20.3	17845.64958	nd	0.1	5.1	10.6	33.4	401.7	2771.5	nd	89064.4	12.5	1.4	2.5	10.5	2545	234.5	10	559	nd	0.1	181.9	nd	245.8	156.7	146.4	19737.8
IH	AR	OES	S1	plastics	2	5.2	17488.74598	nd	0.1	4.7	10.7	31.3	327.7	2763.3	nd	75948.6	10.2	2.2	5	8.7	2363.7	557.6	10.1	718.6	nd	0.5	142.5	nd	248.6	160.2	148.6	17877.8
IH	AR	OES	S1	plastics	3	7.8	24083.15565	nd	0.1	5	10.5	34.1	363.9	6318.4	nd	87491.1	13.3	1.4	2.6	6.6	2523.8	202.7	9.8	441.7	nd	1.7	137.2	nd	250.4	149.7	143.5	18376
IH	AR	OES	S2	metals	1	16	45236.01399	nd	0.3		51.4	211.8	2319.5	200305.9	1.4	262849.7	39.2	2.7	7.6	15.5	3819.9	1936.2	66.7	630.2	9.4	16.9	60.8	18.1	411.1	6.8	8.3	10371.5
IH	AR	OES	S2	metals	2	76.8	52814.25891	nd	0.4		58.2	199.9	3348	234521.6	1.5	283442.8	42.7	1.8	10.6	15.7	3860.2	1622	75.4	629.5	10.6	16.4	71.2	20.8	430.4	7.7	9.1	10567.5
IH	AR	OES	S2	metals	3	52	50643.56436	nd	0.3		50.6	169	3656.9	211336.6	1.3	299752.5	39.4	2.3	10.9	13.6	3888.1	1755	66.9	619.3	16.9	14.9	55.7	27.3	370.7	6.7	7.8	10059.4
IH	AR	OES	S1	metals	1	13.5	73903.87858	nd	0.3		7.8	123.1	1108.8	162774	0.1	210666.1	20.3	1.9	6.1	4.1	3742	920.3	9.6	990.3	nd	1.8	103.5	nd	502.1	4.1	4.2	16003.4
IH	AR	OES	S1	metals	2	10	76546.14653	nd	0.3		8.3	149.4	1798.3	136726.9	0	291056.1	26.8	3.5	6.1	4.5	3884.9	1234.5	12.1	1217.9	nd	1.5	120	nd	565.2	4.4	4.9	14933.4
IH	AR	OES	S1	metals	3	72.2	55396.67897	nd	0.3		8.5	130.4	796.1	141974.2	0	306872.7	22.7	2.8	6.8	3.9	3488.5	912.4	10.7	1330.7	nd	0.8	41.7	nd	535.1	4.4	4.7	12799.8
IH	AR	OES	S2	metals_epoxy	1					9.2
IH	AR	OES	S2	metals_epoxy	2					8.7
IH	AR	OES	S2	metals_epoxy	3					8.7
IH	AR	OES	S1	metals_epoxy	1					7.5
IH	AR	OES	S1	metals_epoxy	2					7.9
IH	AR	OES	S1	metals_epoxy	3					7.5
IH	AR	MS	S2	plastics	1			0.429400387			31.4								0.2	9.7										68.5
IH	AR	MS	S2	plastics	2			0.27587161			23.6								0.7	12.1										46.5
IH	AR	MS	S2	plastics	3			0.109489051			25.1								0.6	10.8										56.2
IH	AR	MS	S1	plastics	1			0.095351609			25								0.8	12.3										63.6
IH	AR	MS	S1	plastics	2			0.24340836			25.9								0.9	11.1										71.6
IH	AR	MS	S1	plastics	3			0.246268657			28.3								0.8	8.3										67.5
IH	AR	MS	S2	metals	1			0.890297203			7.7								2	23.2										7.5
IH	AR	MS	S2	metals	2			1.625234522			8.8								2.7	24.1										8.6
IH	AR	MS	S2	metals	3			0.698514851			7.5								1.6	19.8										7.1
IH	AR	MS	S1	metals	1			0.323777403			10.4								0.9	5.7										4.2
IH	AR	MS	S1	metals	2			0.213606089			8.2								1	5.8										4.6
IH	AR	MS	S1	metals	3			0.208948339			8.8								1	5										4.6
Val	HNO3	OES	S1	plastics	1								432.2	4132								249										22450
Val	HNO3	OES	S1	plastics	2								416.2	7930								252.2										20700
Val	HNO3	OES	S1	plastics	3								601	11980								395.6										21600
Val	HNO3	OES	S1	plastics	4								435.5	3232								370.5										23990
Val	HNO3	OES	S1	plastics	5								396.6	2713								295.4										21980
Val	HNO3	OES	S2	plastics	1								481.1	9016								361.1										22070
Val	HNO3	OES	S2	plastics	2								427	6121								541.4										24380
Val	HNO3	OES	S2	plastics	3								447.8	12430								499.4										23100
Val	HNO3	OES	S2	plastics	4								409.3	8118								465.7										22840
Val	HNO3	OES	S2	plastics	5								467.8	6339								366.2										21000
Val	HNO3	OES	S1	metals	1								1282	139400								1050										13750
Val	HNO3	OES	S1	metals	2								1166	156900								1035										12320
Val	HNO3	OES	S1	metals	3								1380	147600								1009										13630
Val	HNO3	OES	S1	metals	4								1115	161700								962.9										15510
Val	HNO3	OES	S1	metals	5								1142	128600								952										13830
Val	HNO3	OES	S2	metals	1								3763	194410								1817										9238
Val	HNO3	OES	S2	metals	2								3849	189300								1841										9412
Val	HNO3	OES	S2	metals	3								4012	183000								1868										9428
Val	HNO3	OES	S2	metals	4								3886	187300								1818										9540
Val	HNO3	OES	S2	metals	5								3728	200000								1758										9184
Val	HNO3	OES	S1	metals_epoxy	1								673.6	74500								592.9										7805
Val	HNO3	OES	S1	metals_epoxy	2								682.5	79730								636.5										7673
Val	HNO3	OES	S1	metals_epoxy	3								657.1	101200								583.6										22860
Val	HNO3	OES	S1	metals_epoxy	4								667.8	100800								582										8313
Val	HNO3	OES	S1	metals_epoxy	5								588.1	82430								561.8										7991
Val	HNO3	OES	S2	metals_epoxy	1								2362	110700								1076										6584
Val	HNO3	OES	S2	metals_epoxy	2								2388	122410								1066										5902
Val	HNO3	OES	S2	metals_epoxy	3								2389	116200								1091										5936
Val	HNO3	OES	S2	metals_epoxy	4								2359	117400								1090										6193
Val	HNO3	OES	S2	metals_epoxy	5								2463	118700								1158										6017
Val	AR	OES	S1	plastics	1		19090									90600								886.9
Val	AR	OES	S1	plastics	2		21070									84770								849.6
Val	AR	OES	S1	plastics	3		19560									77030								894.9
Val	AR	OES	S1	plastics	4		20700									87830								891.9
Val	AR	OES	S1	plastics	5		19990									92460								822.3
Val	AR	OES	S2	plastics	1		19070									65890								2752
Val	AR	OES	S2	plastics	2		20050									83750								2298
Val	AR	OES	S2	plastics	3		20410									87110								2454
Val	AR	OES	S2	plastics	4		20130									75960								2417
Val	AR	OES	S2	plastics	5		19080									73680								2275
Val	AR	OES	S1	metals	1		80160									222100								1908
Val	AR	OES	S1	metals	2		85590									357100								1433
Val	AR	OES	S1	metals	3		76110									241700								1866
Val	AR	OES	S1	metals	4		94670									198400								1729
Val	AR	OES	S1	metals	5		86170									293800								1653
Val	AR	OES	S2	metals	1		54890									272900								675.4
Val	AR	OES	S2	metals	2		52610									267500								659.9
Val	AR	OES	S2	metals	3		53110									271200								694.8
Val	AR	OES	S2	metals	4		59930									266900								619.6
Val	AR	OES	S2	metals	5		58070									279400								762.1
Val	AR	OES	S1	metals_epoxy	1		42980									146200								946.6
Val	AR	OES	S1	metals_epoxy	2		47840									126100								998.4
Val	AR	OES	S1	metals_epoxy	3		40600									161400								1024
Val	AR	OES	S1	metals_epoxy	4		45820									132300								924.8
Val	AR	OES	S1	metals_epoxy	5		49300									128500								932.8
Val	AR	OES	S2	metals_epoxy	1		34470									171000								418.4
Val	AR	OES	S2	metals_epoxy	2		37290									163800								514.3
Val	AR	OES	S2	metals_epoxy	3		33290									188400								398.8
Val	AR	OES	S2	metals_epoxy	4		34110									171200								466.8
Val	AR	OES	S2	metals_epoxy	5		33350									169900								423.9
Val	HNO3	MS	S1	plastics	1					1.3		27.3			1.4					6.4										151.5	147.6
Val	HNO3	MS	S1	plastics	2					2.2		18.7			1.6					5.5										150.5	139.1
Val	HNO3	MS	S1	plastics	3					1.4		51.1			1.2					8.5										149.8	142.6
Val	HNO3	MS	S1	plastics	4					1.6		29.1			1.7					8.2										147.2	138.8
Val	HNO3	MS	S1	plastics	5					1.4		20.8			1.5					5.9										152	147.6
Val	HNO3	MS	S2	plastics	1					3.1		25.4			0.9					7.8										116	121.6
Val	HNO3	MS	S2	plastics	2					4.2		23.6			0.8					8.9										108.3	108.2
Val	HNO3	MS	S2	plastics	3					3.2		20.2			0.9					7.4										112.2	113.6
Val	HNO3	MS	S2	plastics	4					2.9		22.9			0.9					30.5										108.8	112.8
Val	HNO3	MS	S2	plastics	5					3.9		33.1			0.9					7.6										113.9	114.2
Val	HNO3	MS	S1	metals	1					0.6		78.2			3.9					6.6										7.5	6.1
Val	HNO3	MS	S1	metals	2					0.6		78.8			3.4					5.2										6.8	5.7
Val	HNO3	MS	S1	metals	3					0.6		85.3			3.8					5.8										7.3	5.9
Val	HNO3	MS	S1	metals	4					0.6		83.2			3.7					6.9										7.3	6
Val	HNO3	MS	S1	metals	5					0.6		79.2			4.1					6.5										7.3	6.3
Val	HNO3	MS	S2	metals	1					0.4		122.2			12.7					18.5										8.4	7.3
Val	HNO3	MS	S2	metals	2					0.3		173.5			12.6					17.8										8	7
Val	HNO3	MS	S2	metals	3					0.3		130			13.3					17.5										7.9	7.3
Val	HNO3	MS	S2	metals	4					0.3		124.5			13					24.7										7.9	7.3
Val	HNO3	MS	S2	metals	5					0.3		122.7			12.4					17.2										7.7	7.1
Val	HNO3	MS	S1	metals_epoxy	1					0.6		57.7			2.1					4										4.1	3.5
Val	HNO3	MS	S1	metals_epoxy	2					0.7		47.1			2.1					4										4.1	4.2
Val	HNO3	MS	S1	metals_epoxy	3					0.6		51.6			2					3.8										3.9	3.3
Val	HNO3	MS	S1	metals_epoxy	4					0.7		46.6			1.9					3.3										4.1	3.3
Val	HNO3	MS	S1	metals_epoxy	5					0.9		45.2			3.7					3.2										4	3.4
Val	HNO3	MS	S2	metals_epoxy	1					0.4		83.3			8.5					10.3										5	4.8
Val	HNO3	MS	S2	metals_epoxy	2					0.3		83.4			8.3					16.8										4.8	4.6
Val	HNO3	MS	S2	metals_epoxy	3					0.2		81.4			8.5					10.5										4.9	4.5
Val	HNO3	MS	S2	metals_epoxy	4					0.3		84.4			8.2					10.1										4.9	4.4
Val	HNO3	MS	S2	metals_epoxy	5					0.3		114.2			8.4					12.2										5.2	4.6
Val	AR	MS	S1	plastics	1			0.238348531															41.8		2.7	0.1	145.3		291.2
Val	AR	MS	S1	plastics	2			0.14478197															32.7		2.6	0.1	134.7		279.7
Val	AR	MS	S1	plastics	3			0.159045226															23.2		2.4	0.1	149.6		259.5
Val	AR	MS	S1	plastics	4			0.178425358															21.4		2	0.1	137.9		266.5
Val	AR	MS	S1	plastics	5			0.160372732															26.2		2.3	0.1	153.9		279.9
Val	AR	MS	S2	plastics	1			0.322869955															31.6		3.2	0.7	129.5		212.2
Val	AR	MS	S2	plastics	2			0.249224405															19.4		3.3	0.5	94.5		217.9
Val	AR	MS	S2	plastics	3			6.043895055															23.1		3.7	0.7	129.3		242.4
Val	AR	MS	S2	plastics	4			0.396627566															18		3.4	0.5	121.4		239.4
Val	AR	MS	S2	plastics	5			0.346898263															15.8		2.2	0.4	105		246
Val	AR	MS	S1	metals	1			0.895895153															36.4		0.8	0	171.7		798.2
Val	AR	MS	S1	metals	2			1.232581967															28.4		0.6	0	112.4		725.9
Val	AR	MS	S1	metals	3			0.7813576															36		1	0	157.1		802.7
Val	AR	MS	S1	metals	4			0.883384933															38		1	0	151.5		781.3
Val	AR	MS	S1	metals	5			0.610784314															34.8		0.7	0	146.3		744.8
Val	AR	MS	S2	metals	1			1.273299748															203.2		0.3	0	138.7		448.3
Val	AR	MS	S2	metals	2			2.081925243															203.7		0.3	0	132.7		430.1
Val	AR	MS	S2	metals	3			1.533253012															198.7		0.3	0	147.8		498.3
Val	AR	MS	S2	metals	4			1.258785141															195.4		0.3	0	132.1		436.6
Val	AR	MS	S2	metals	5			3.424204771															200.9		0.3	0	139.3		531.1
Val	AR	MS	S1	metals_epoxy	1			0.241785189															20.1		1	0	96.7		530.9
Val	AR	MS	S1	metals_epoxy	2			0.351323829															20.2		1.3	0	102.9		561.5
Val	AR	MS	S1	metals_epoxy	3			0.257705912															18.4		2.3	0	99.1		547.1
Val	AR	MS	S1	metals_epoxy	4			0.982741117															19.6		0.7	0	99.8		532.8
Val	AR	MS	S1	metals_epoxy	5			0.391425672															20.8		0.7	0	114.1		500.1
Val	AR	MS	S2	metals_epoxy	1			1.207635468															132.7		0.2	0	88.7		331.3
Val	AR	MS	S2	metals_epoxy	2			0.615422886															130.5		0.2	0	88.4		298.3
Val	AR	MS	S2	metals_epoxy	3			0.5997999															136.6		0.2	0	84.9		316.3
Val	AR	MS	S2	metals_epoxy	4			0.647540984															137.4		0.2	0	82.7		304.1
Val	AR	MS	S2	metals_epoxy	5			0.829798241															150		0.2	0	90.7		300.6
XRF	wax	XRF	S1	plastics	1		23000						1000	6000		140000						600		3000			400		700			54000
XRF	powder	XRF	S1	plastics	1		30000						1000	4000		130000						500		2000			300		600			44000
XRF	fusion	XRF	S1	plastics	1		30000						1000	7000		100000						400		300			nd		500			17000
XRF	wax	XRF	S2	plastics	1		18000						1000	5000		111000						800		5000			300		500			40000
XRF	powder	XRF	S2	plastics	1		25000						1000	4000		100000						500		4000			200		400			35000
XRF	fusion	XRF	S2	plastics	1		35000						1000	8000		100000						700		1000			nd		400			22000
XRF	wax	XRF	S1	metals	1		80000						2000	180000		260000						1200		2000			nd		2000			23000
XRF	powder	XRF	S1	metals	1		121000						2000	140000		220000						1000		3000			200		1000			18000
XRF	fusion	XRF	S1	metals	1		83000						2000	110000		200000						1000		nd			nd		900			10000
XRF	wax	XRF	S2	metals	1		59000						5000	220000		290000						2000		1000			nd		600			12000
XRF	powder	XRF	S2	metals	1		79000						5000	200000		270000						2000		700			nd		700			11000
XRF	fusion	XRF	S2	metals	1		55000						4000	130000		240000						2000		nd			nd		nd			6000
XRF	wax	XRF	S1	metals_epoxy	1		53000						1000	100000		150000						1000		2000			nd		1000			12000
XRF	powder	XRF	S1	metals_epoxy	1		60000						1000	100000		140000						1000		2000			nd		1000			12000
XRF	fusion	XRF	S1	metals_epoxy	1		75000						2000	90000		170000						1000		nd			nd		1000			6000
XRF	wax	XRF	S2	metals_epoxy	1		44000						3000	140000		190000						1100		600			nd		400			8000
XRF	powder	XRF	S2	metals_epoxy	1		51000						3000	130000		180000						1100		600			200		400			7000
XRF	fusion	XRF	S2	metals_epoxy	1		50000						4000	120000		220000						2000										4000
Val	HNO3	MS	S1	fine	1					7.375961046		54.90606981			3.751409534					19.43737325										7.777386134	0.196497068
Val	HNO3	MS	S1	fine	2					7.067932068		121.2665879			0.984265734					21.00643635										1.999313779	0.196336267
Val	HNO3	MS	S1	fine	3					7.271421616		62.56355708			0.916504382					16.58584915										2.700881911	0.213071351
Val	HNO3	MS	S1	fine	4					6.931068439		278.2675063			1.12826194					21.68090111										2.073907232	0.157486754
Val	HNO3	MS	S1	fine	5					6.783453237		54.61618986			1.657074341					16.56385619										2.055434454	0.17929232
Val	HNO3	MS	S1	coarse	1					2.400973236		20.05834089			0.75377129					11.37733551										3.077658729	0.277129363
Val	HNO3	MS	S1	coarse	2					2.440545809		16.87949584			0.803362573					11.0949704										2.983354446	0.240451198
Val	HNO3	MS	S1	coarse	3					2.642042638		16.86446234			0.697322757					11.21118922										3.136023098	0.250437669
Val	HNO3	MS	S1	coarse	4					2.430043124		17.94979221			0.844513656					10.54335066										2.963217655	0.324477239
Val	HNO3	MS	S1	coarse	5					2.480947728		37.36874509			0.722032242					10.5967432										3.025875265	0.225111017
Val	HNO3	MS	S2	fine	1					2.040151515		27.54336356			1.656313131					8.59472899										6.923478272	0.15640195
Val	HNO3	MS	S2	fine	2					2.098746867		28.56020623			1.690225564					7.905852107										13.50642582	0.15632121
Val	HNO3	MS	S2	fine	3					1.837125129		29.62884225			1.414167528					8.563332105										7.989869948	0.168645139
Val	HNO3	MS	S2	fine	4					1.521472393		25.97013569			0.571063395					6.005854663										6.381038494	0.120154388
Val	HNO3	MS	S2	fine	5					2.34493988		24.63984577			1.235721443					6.83870127										6.015061209	0.160678336
Val	HNO3	MS	S2	coarse	1					2.035915854		41.06562278			1.506413545					11.61879576										7.944731223	0.209220564
Val	HNO3	MS	S2	coarse	2					2.097236181		49.32676311			1.585427136					12.45719555										9.060331671	0.190071713
Val	HNO3	MS	S2	coarse	3					2.134005038		38.03387336			9.738539043					15.05916006										8.369400508	0.210961372
Val	HNO3	MS	S2	coarse	4					2.02218256		32.94428912			1.618561958					13.9387905										7.714419713	0.194157309
Val	HNO3	MS	S2	coarse	5					2.097614411		59.42609111			2.046738072					13.69046977										8.220990682	0.23241636
Val	HNO3	OES	S1	fine	1								893.7	36590								733.9										55970
Val	HNO3	OES	S1	fine	2								1780	25100								955.4										55810
Val	HNO3	OES	S1	fine	3								778	28620								716.4										59970
Val	HNO3	OES	S1	fine	4								713.7	22140								714.2										55460
Val	HNO3	OES	S1	fine	5								2224	31750								1568										58140
Val	HNO3	OES	S1	coarse	1								420.4	76440								313										36790
Val	HNO3	OES	S1	coarse	2								390.2	73870								334.8										38510
Val	HNO3	OES	S1	coarse	3								461.4	48790								420.9										36660
Val	HNO3	OES	S1	coarse	4								527.7	64280								353.1										37620
Val	HNO3	OES	S1	coarse	5								366.9	68710								335.1										35070
Val	HNO3	OES	S2	fine	1								876.6	21690								506.7										28400
Val	HNO3	OES	S2	fine	2								856	21460								389.2										29090
Val	HNO3	OES	S2	fine	3								886.9	20110								670.8										33670
Val	HNO3	OES	S2	fine	4								837.8	37190								640.6										27930
Val	HNO3	OES	S2	fine	5								1034	17500								380.8										28850
Val	HNO3	OES	S2	coarse	1								609.2	47710								339.8										27510
Val	HNO3	OES	S2	coarse	2								557.9	45720								330.8										27360
Val	HNO3	OES	S2	coarse	3								694.3	56820								348.3										28090
Val	HNO3	OES	S2	coarse	4								548.1	42010								289.5										26620
Val	HNO3	OES	S2	coarse	5								699.3	45890								389.5										28930
Val	AR	MS	S1	fine	1			0.097726173															32.58191403		18.60575957	3.881954523	162.4217635		322.5452316
Val	AR	MS	S1	fine	2			0.245631068															25.56584477		17.09628818	2.935679612	177.8473908		323.5382707
Val	AR	MS	S1	fine	3			191.5581513															22.05005598		17.70879582	3.267394617	181.0246904		542.7358975
Val	AR	MS	S1	fine	4			0.168859649															38.47070769		17.6317907	3.519005848	176.7533849		347.4886108
Val	AR	MS	S1	fine	5			0.152784747															19.79681221		8.669742777	1.821374812	150.9797292		318.1237486
Val	AR	MS	S1	coarse	1			nd															13.16868969		3.188598213	0.608208955	831.8831753		254.689558
Val	AR	MS	S1	coarse	2			nd															11.22647727		4.135871153	0.575150301	864.8288537		256.1174367
Val	AR	MS	S1	coarse	3			nd															12.81979737		3.605629686	0.656172533	812.0615514		265.3567398
Val	AR	MS	S1	coarse	4			nd															17.94606356		4.529796159	0.776004119	835.2597184		495.1218833
Val	AR	MS	S1	coarse	5			nd															14.78928667		3.936666341	0.693743693	844.0617067		250.7892191
Val	AR	MS	S2	fine	1			0.414728682															27.04548281		6.985966276	nd	149.7834542		360.1922437
Val	AR	MS	S2	fine	2			0.071600192															21.0179535		4.660370289	nd	142.9881072		491.517292
Val	AR	MS	S2	fine	3			0.068816658															33.81531215		5.739923546	nd	142.9360483		318.9098877
Val	AR	MS	S2	fine	4			0.222644377															27.36190561		12.69664703	nd	153.5851394		389.9819777
Val	AR	MS	S2	fine	5			0.077471967															52.0587164		7.564466965	nd	165.1920189		455.0216557
Val	AR	MS	S2	coarse	1			0.171745868															40.57302127		4.138687997	nd	801.4155894		398.4407735
Val	AR	MS	S2	coarse	2			0.115345785															33.16439406		4.333369994	nd	772.3384374		403.035504
Val	AR	MS	S2	coarse	3			28.36545012															36.14401873		4.942232921	nd	761.884644		415.5270758
Val	AR	MS	S2	coarse	4			2.649312377															36.20554675		4.167315455	nd	803.8786966		412.8378091
Val	AR	MS	S2	coarse	5			0.117171717															34.6207844		4.302099857	nd	725.7354314		415.4564656
Val	AR	OES	S1	fine	1		23690									204800								5217
Val	AR	OES	S1	fine	2		25010									199500								5361
Val	AR	OES	S1	fine	3		22970									197500								6279
Val	AR	OES	S1	fine	4		24110									191800								5031
Val	AR	OES	S1	fine	5		21450									226300								4636
Val	AR	OES	S1	coarse	1		21110									57160								2714
Val	AR	OES	S1	coarse	2		21910									54030								2802
Val	AR	OES	S1	coarse	3		22380									54490								2880
Val	AR	OES	S1	coarse	4		21770									52750								2786
Val	AR	OES	S1	coarse	5		22090									50390								2754
Val	AR	OES	S2	fine	1		17720									151500								1232
Val	AR	OES	S2	fine	2		19750									167700								1100
Val	AR	OES	S2	fine	3		21700									162100								971.4
Val	AR	OES	S2	fine	4		17980									151900								1726
Val	AR	OES	S2	fine	5		16900									165300								1147
Val	AR	OES	S2	coarse	1		20530									93790								1010
Val	AR	OES	S2	coarse	2		22320									83600								985.4
Val	AR	OES	S2	coarse	3		21200									83150								979.5
Val	AR	OES	S2	coarse	4		19920									99310								1008
Val	AR	OES	S2	coarse	5		20280									99230								1133
XRF	wax	XRF	S1	fine	1		25000						2000	21000		190000						2000		14000			nd		1000			110000
XRF	powder	XRF	S1	fine	1		40000						1000	14000		170000						1000		9000			300		1000			84000
XRF	fusion	XRF	S1	fine	1		23000						1000	21000		140000						1000		3000			nd		400			35000
XRF	wax	XRF	S1	coarse	1		26000						1000	46000		60000						1000		5000			nd		1000			46000
XRF	powder	XRF	S1	coarse	1		32000						1000	45000		50000						1000		4000			1000		2000			41000
XRF	fusion	XRF	S1	coarse	1		26000						1000	31000		50000						400		200			1000		1000			29000
XRF	wax	XRF	S2	fine	1		21000						2000	22000		190000						1000		3000			nd		1000			71000
XRF	powder	XRF	S2	fine	1		36000						2000	15000		150000						1000		3000			300		1000			58000
XRF	fusion	XRF	S2	fine	1		17000						1000	10000		90000						400		1000			nd		400			16000
XRF	wax	XRF	S2	coarse	1		27000						1000	47000		80000						1000		2000			nd		1000			37000
XRF	powder	XRF	S2	coarse	1		31000						1000	45000		90000						400		1000			1000		1000			36000
XRF	fusion	XRF	S2	coarse	1		26000						1000	22000		70000						300		nd			1000		1000			19000
